# Supplementary material
Source: publisher figshare collection journal article supplement (https://sage.figshare.com/ndownloader/files/18044480)
Supplement: Supplementary file 1 [file 18044480]

**Appendix 3.** Association between Other Protein Intakes per Eating Occasion Thresholds and Functional Disability.

|  | **Odds Ratio** | **95% Confidence Interval** | |
| --- | --- | --- | --- |
| ***≥****0.20 g/kg/meal Protein Intake per Eating Occasion* |  |  |  |
| **1 Occasion (Reference: 0 Occasions)** | 0.29 | 0.14, | 0.60 |
| **2 Occasions (Reference: 0 Occasions)** | 0.28 | 0.14, | 0.57 |
| **3 Occasions (Reference: 0 Occasions)** | 0.25 | 0.12, | 0.51 |
| **4 Occasions (Reference: 0 Occasions)** | 0.18 | 0.09, | 0.40 |
| Female (Reference: Male) | 0.57 | 0.48, | 0.67 |
| Non-Hispanic Black (Reference: Non-Hispanic White) | 0.70 | 0.59, | 0.83 |
| Hispanic (Reference: Non-Hispanic White) | 0.84 | 0.71, | 1.01 |
| Other Ethnicity (Reference: Non-Hispanic White) | 1.25 | 0.92, | 1.70 |
| Age | 1.08 | 1.07, | 1.09 |
| Protein-Adjusted Total Calories† | 1.02 | 1.01, | 1.04 |
| Current Smoker (Reference: Previous Smoker) | 1.24 | 0.94, | 1.63 |
| Non-Smoker (Reference: Previous Smoker) | 0.72 | 0.62, | 0.85 |
| Moderate Physical Activity (Reference: No Moderate Physical Activity) | 0.68 | 0.58, | 0.79 |
| Self-Rated Health (Reference: Poor) |  |  |  |
| Excellent | 0.06 | 0.03, | 0.12 |
| Very Good | 0.12 | 0.07, | 0.24 |
| Good | 0.17 | 0.09, | 0.32 |
| Fair | 0.47 | 0.25, | 0.89 |
| Body Mass Index | 1.07 | 1.06, | 1.09 |
| Diabetes (Reference: No Diabetes) | 1.22 | 1.00, | 1.48 |
| Married (Reference: Not Married) | 0.79 | 0.64, | 0.97 |
| Graduated High School (Reference: No High School Graduate) | 0.89 | 0.74, | 1.07 |
| Live Alone (Reference: Not Alone) | 0.87 | 0.70, | 1.09 |
| ***≥****0.38 g/kg/meal Protein Intake per Eating Occasion* |  |  |  |
| **1 Occasion (Reference: 0 Occasions)** | 0.73 | 0.59, | 0.90 |
| **2 Occasions (Reference: 0 Occasions)** | 0.68 | 0.53, | 0.88 |
| **3 Occasions (Reference: 0 Occasions)** | 0.81 | 0.51, | 1.27 |
| **4 Occasions (Reference: 0 Occasions)** | 0.63 | 0.25, | 1.60 |
| Female (Reference: Male) | 0.59 | 0.50, | 0.69 |
| Non-Hispanic Black (Reference: Non-Hispanic White) | 0.70 | 0.59, | 0.83 |
| Hispanic (Reference: Non-Hispanic White) | 0.84 | 0.70, | 1.01 |
| Other Ethnicity (Reference: Non-Hispanic White) | 1.22 | 0.90, | 1.66 |
| Age | 1.08 | 1.07, | 1.09 |
| Protein-Adjusted Total Calories† | 1.02 | 1.00, | 1.03 |
| Current Smoker (Reference: Previous Smoker) | 1.26 | 0.96, | 1.66 |
| Non-Smoker (Reference: Previous Smoker) | 0.72 | 0.61, | 0.85 |
| Moderate Physical Activity (Reference: No Moderate Physical Activity) | 0.68 | 0.58, | 0.79 |
| Self-Rated Health (Reference: Poor) |  |  |  |
| Excellent | 0.06 | 0.03, | 0.12 |
| Very Good | 0.13 | 0.07, | 0.24 |
| Good | 0.17 | 0.09, | 0.32 |
| Fair | 0.47 | 0.25, | 0.88 |
| Body Mass Index | 1.07 | 1.06, | 1.09 |
| Diabetes (Reference: No Diabetes) | 1.19 | 0.98, | 1.46 |
| Married (Reference: Not Married) | 0.77 | 0.63, | 0.95 |
| Graduated High School (Reference: No High School Graduate) | 0.89 | 0.74, | 1.06 |
| Live Alone (Reference: Not Alone) | 0.86 | 0.69, | 1.08 |

†Per 100 Calories.
